# Supplementary material for: White adipose remodeling during browning in mice involves YBX1 to drive thermogenic commitment
Source: PubMed Central journal article supplement — Mol Metab. 2020 Dec 5;44:101137. doi: 10.1016/j.molmet.2020.101137 (PMC7779825; doi:10.1016/j.molmet.2020.101137), 2020-12-05
Supplement: mmc1.pdf [file mmc1.pdf]

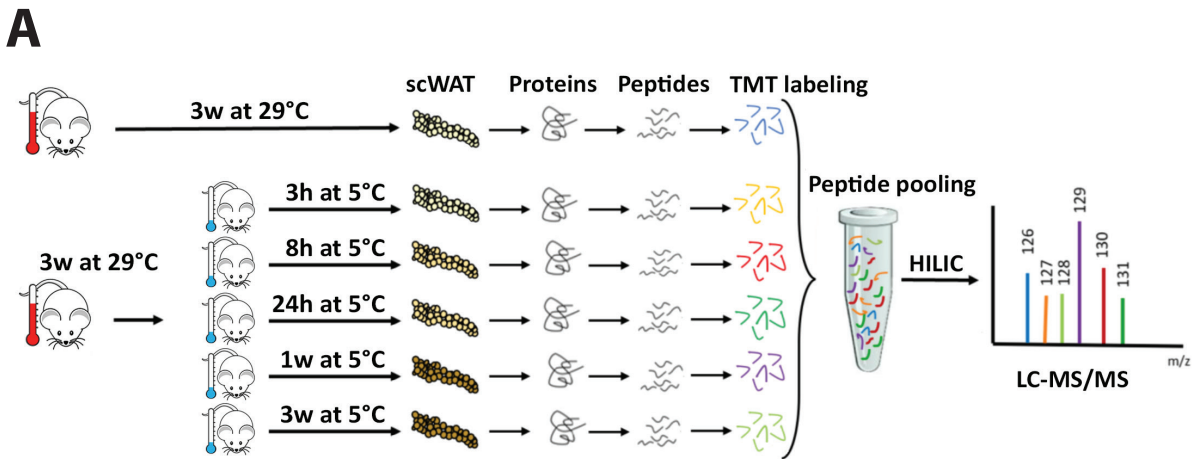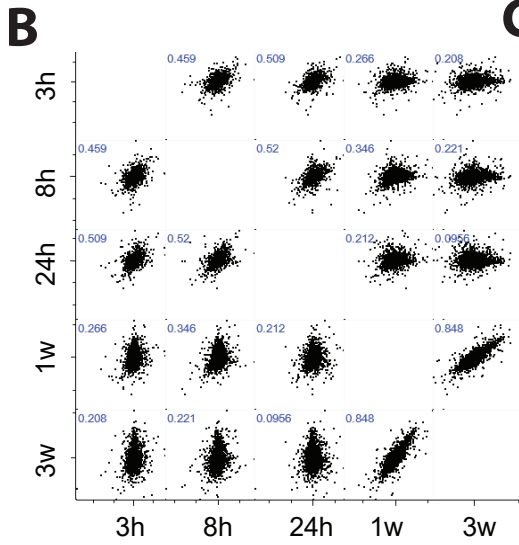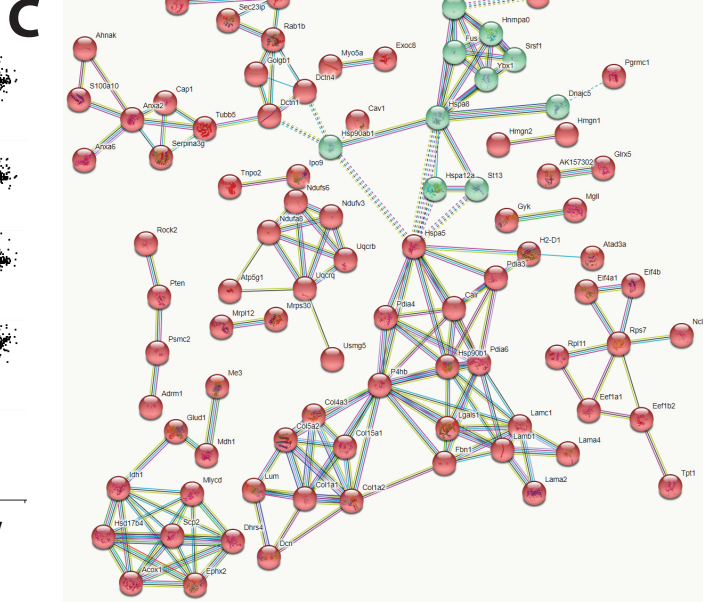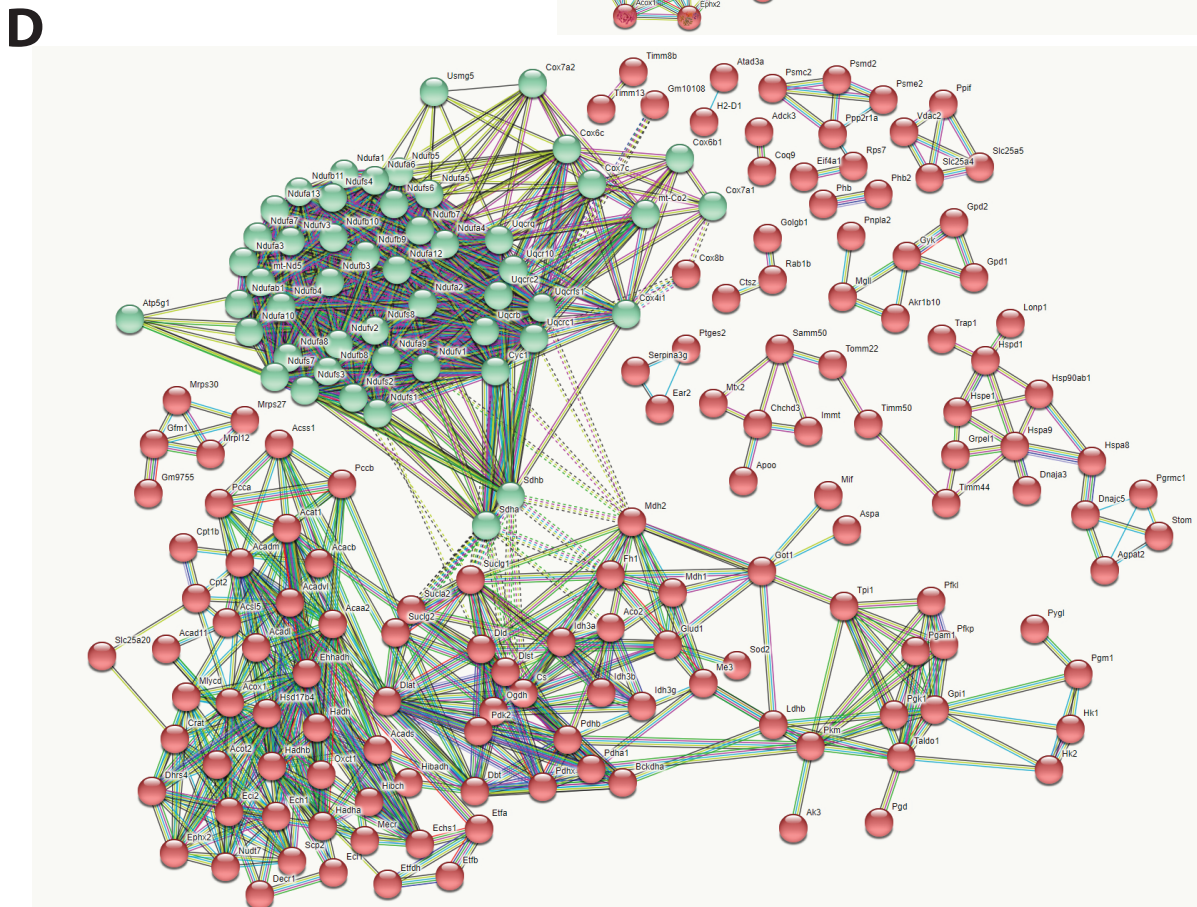

Figure S1. Proteomic regulation by acute and chronic cold in scWAT, Related to Figure 1.

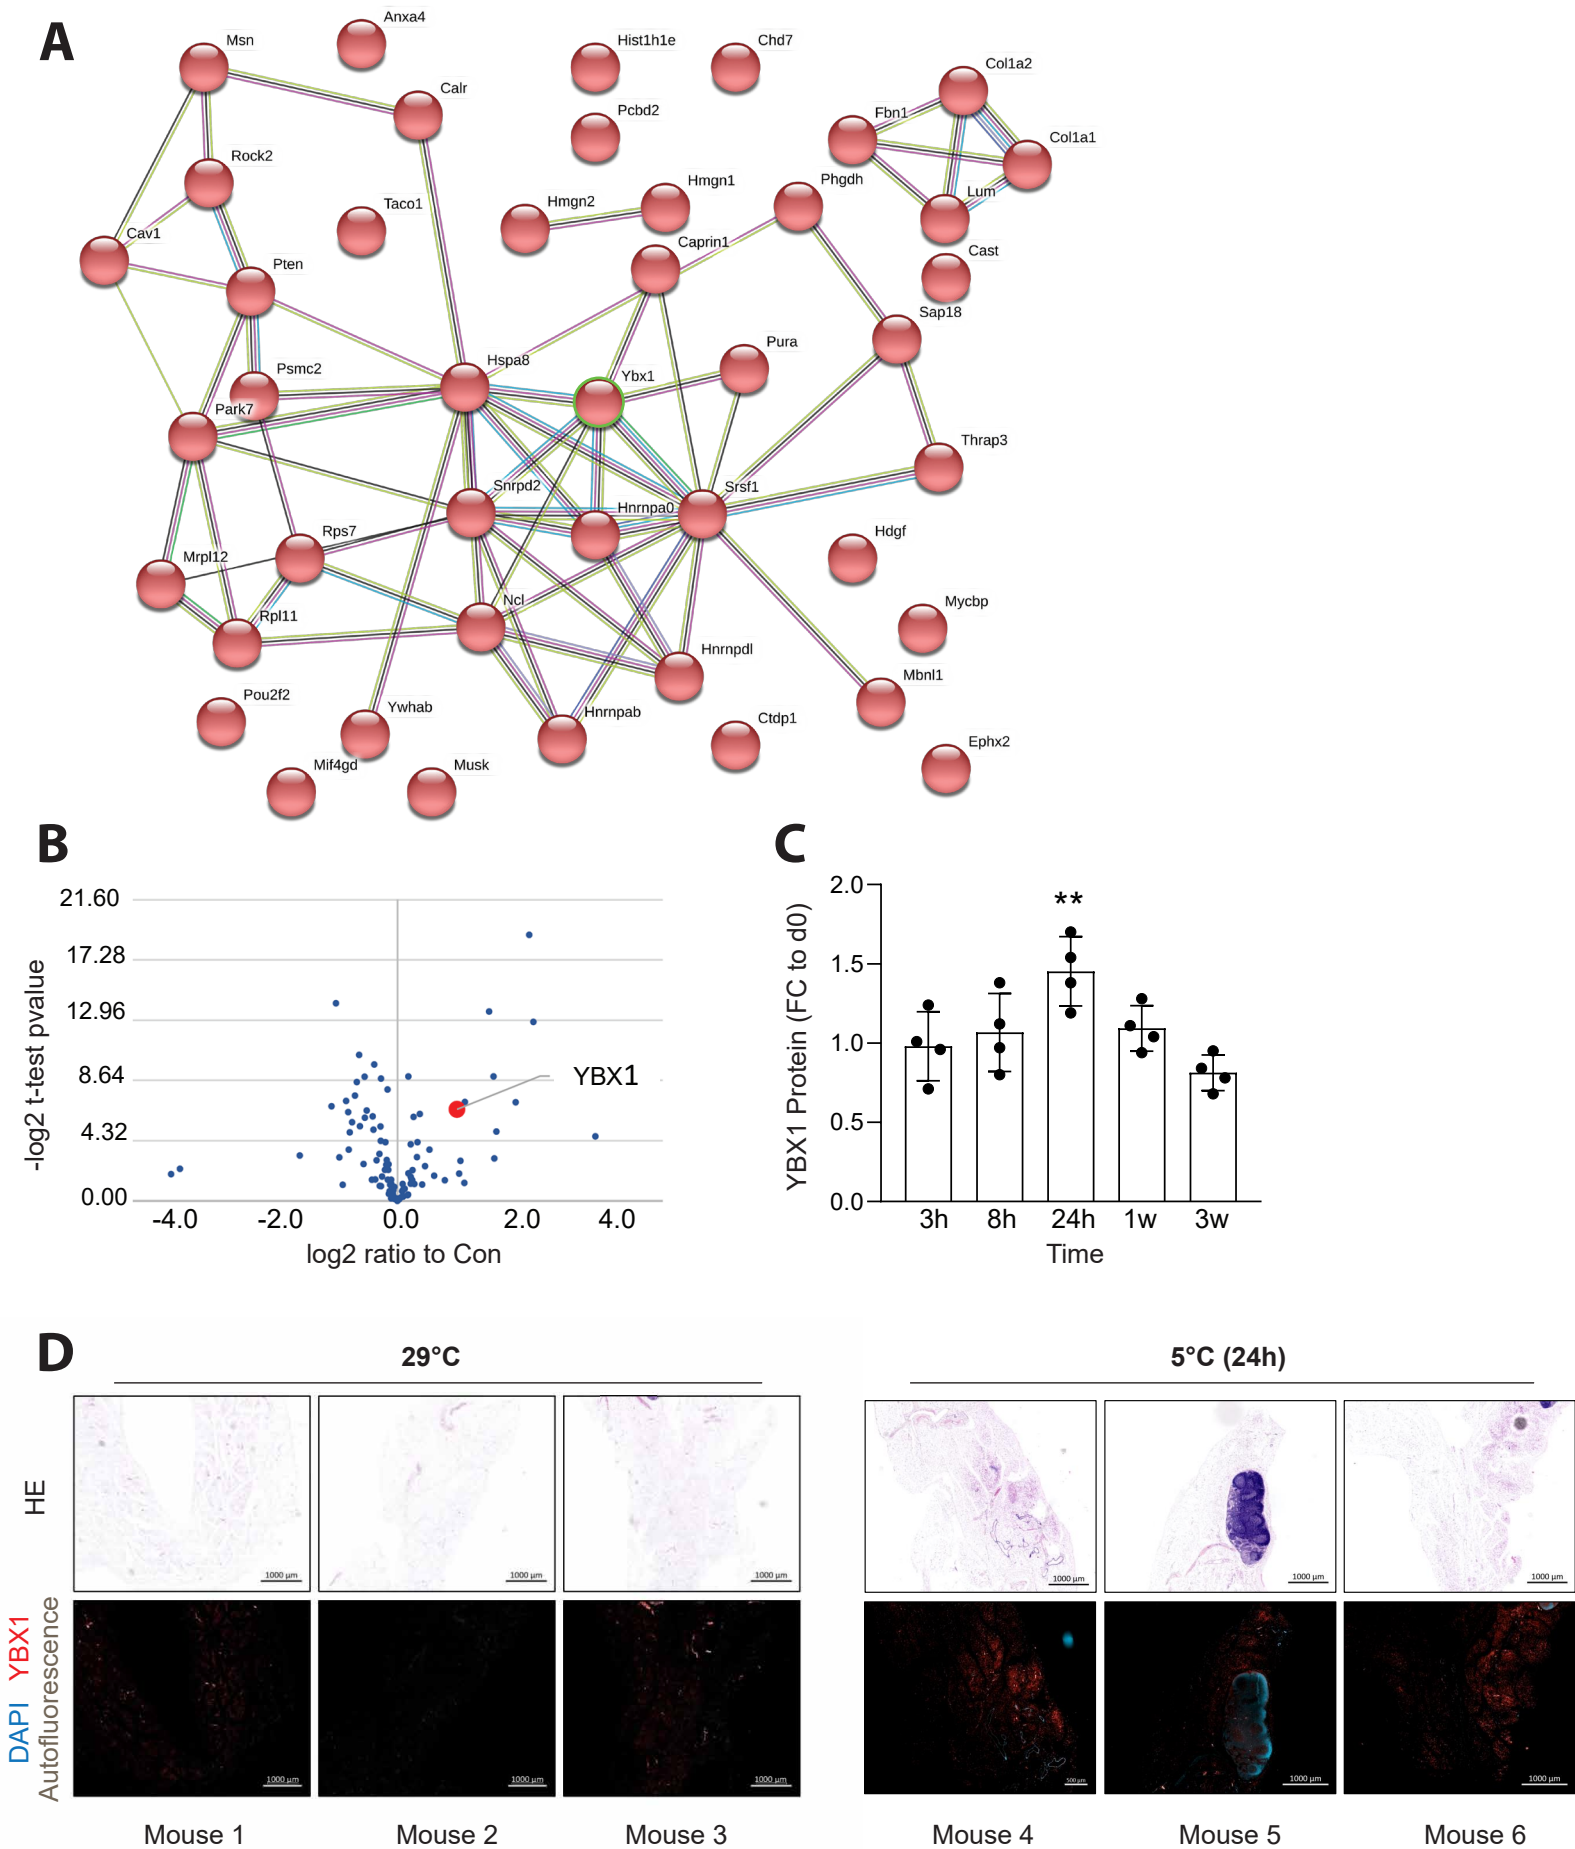

Figure S2. YBX1 is a transcriptional regulator acutely upregulated in response to cold in scWAT, Related to Figure 2.

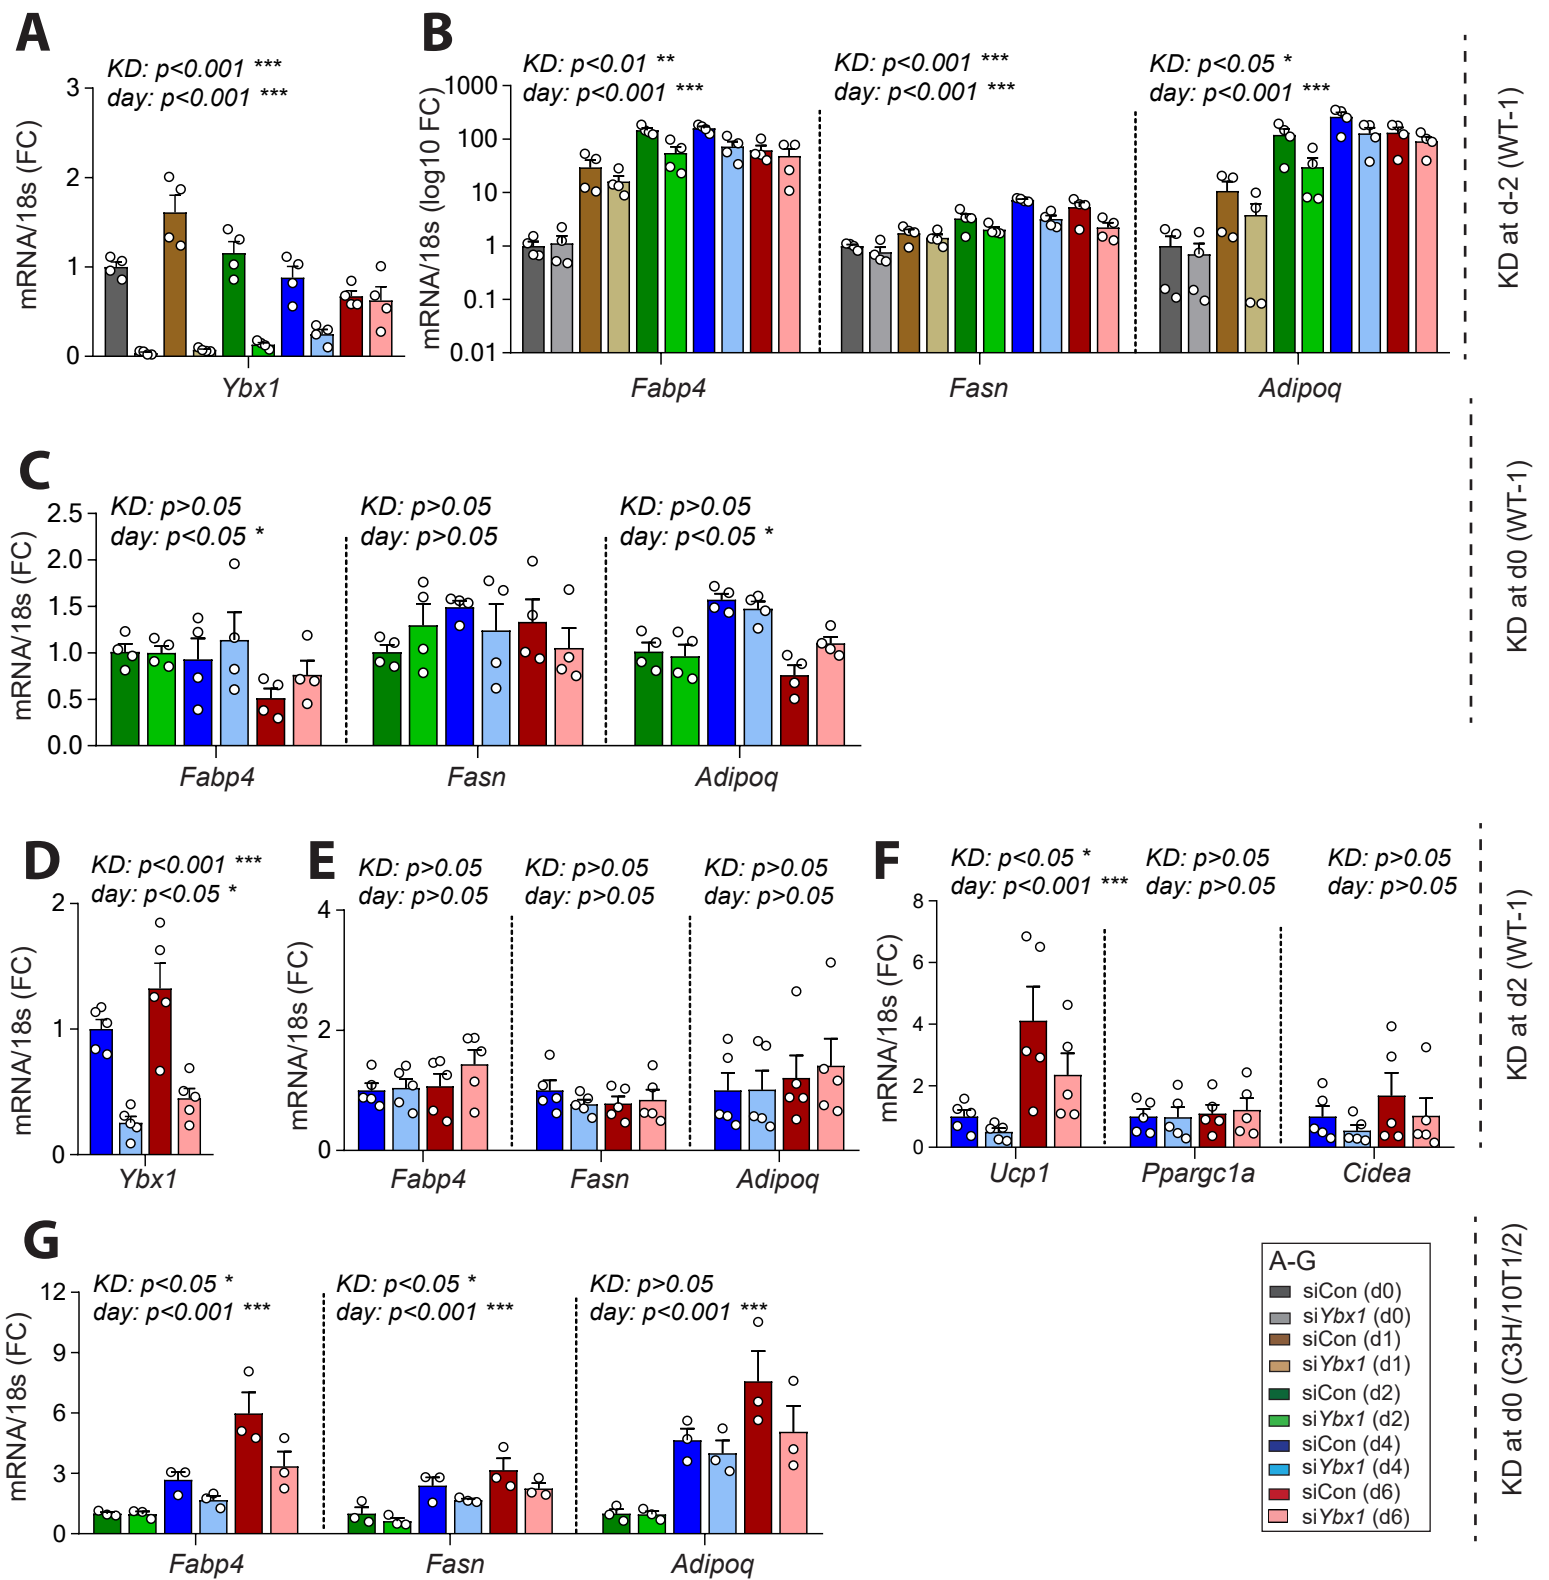

Figure S3. YBX1 is a regulator of early adipogenesis that also functions as a commitment factor in thermogenic adipocytes, Related to Figure 3.

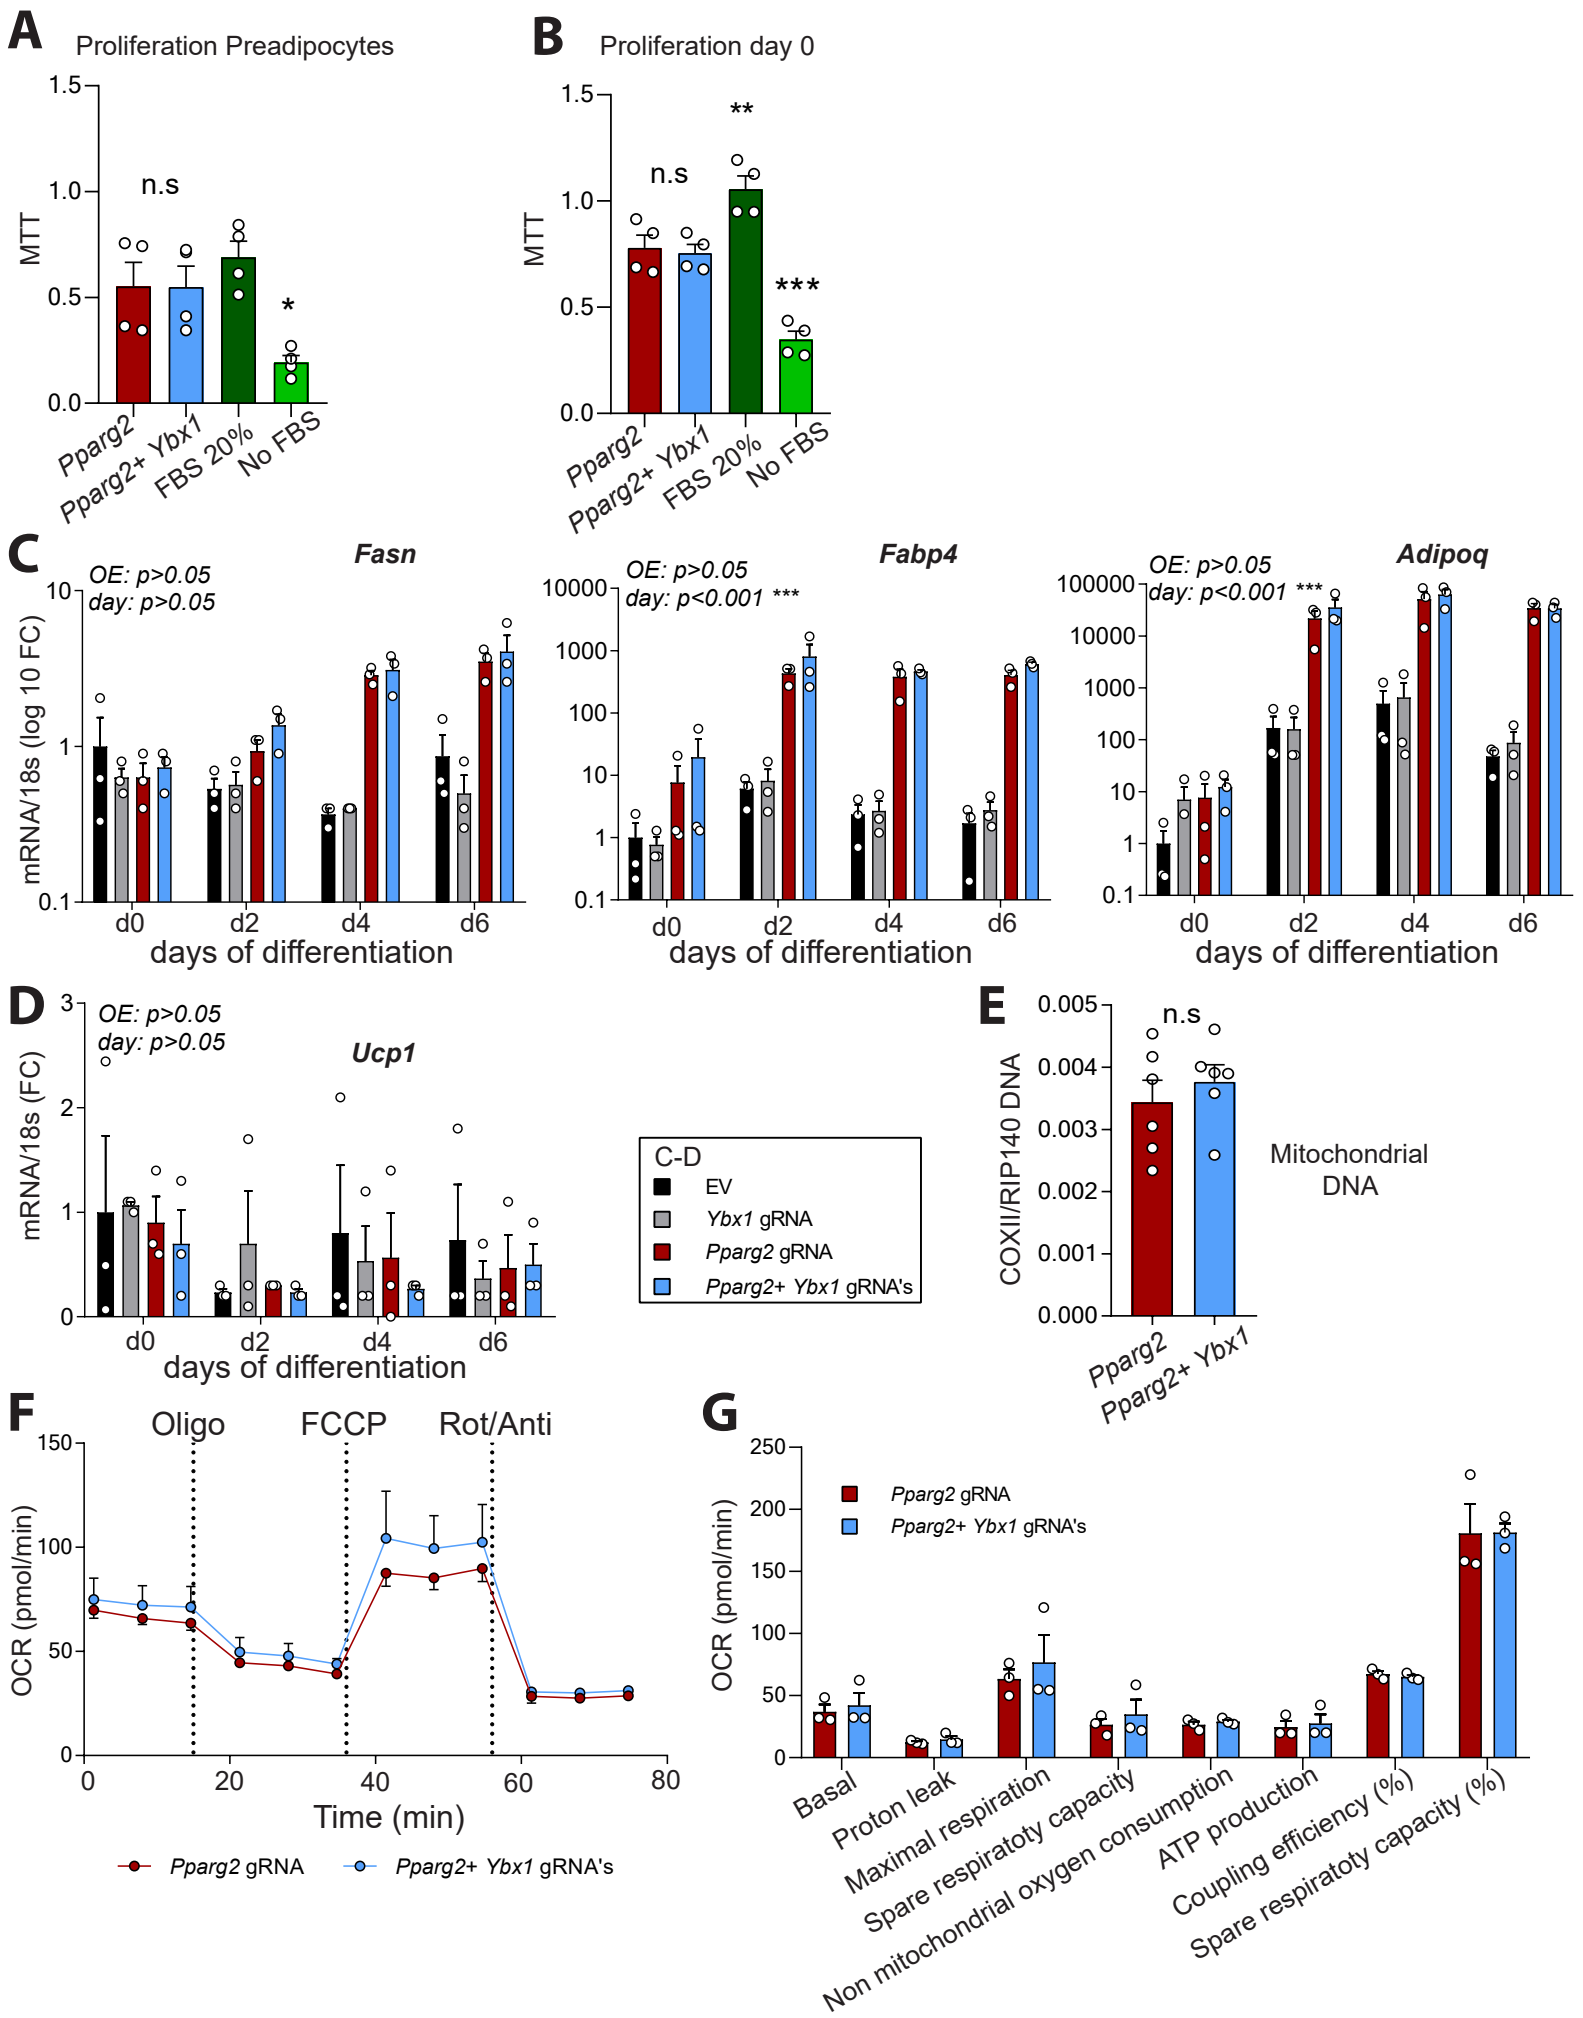

Figure S4. Effect of Ybx1 overexpression on cell proliferation, differentiation, mitochondrial DNA content, and mitochondrial function, Related to Figure 4.

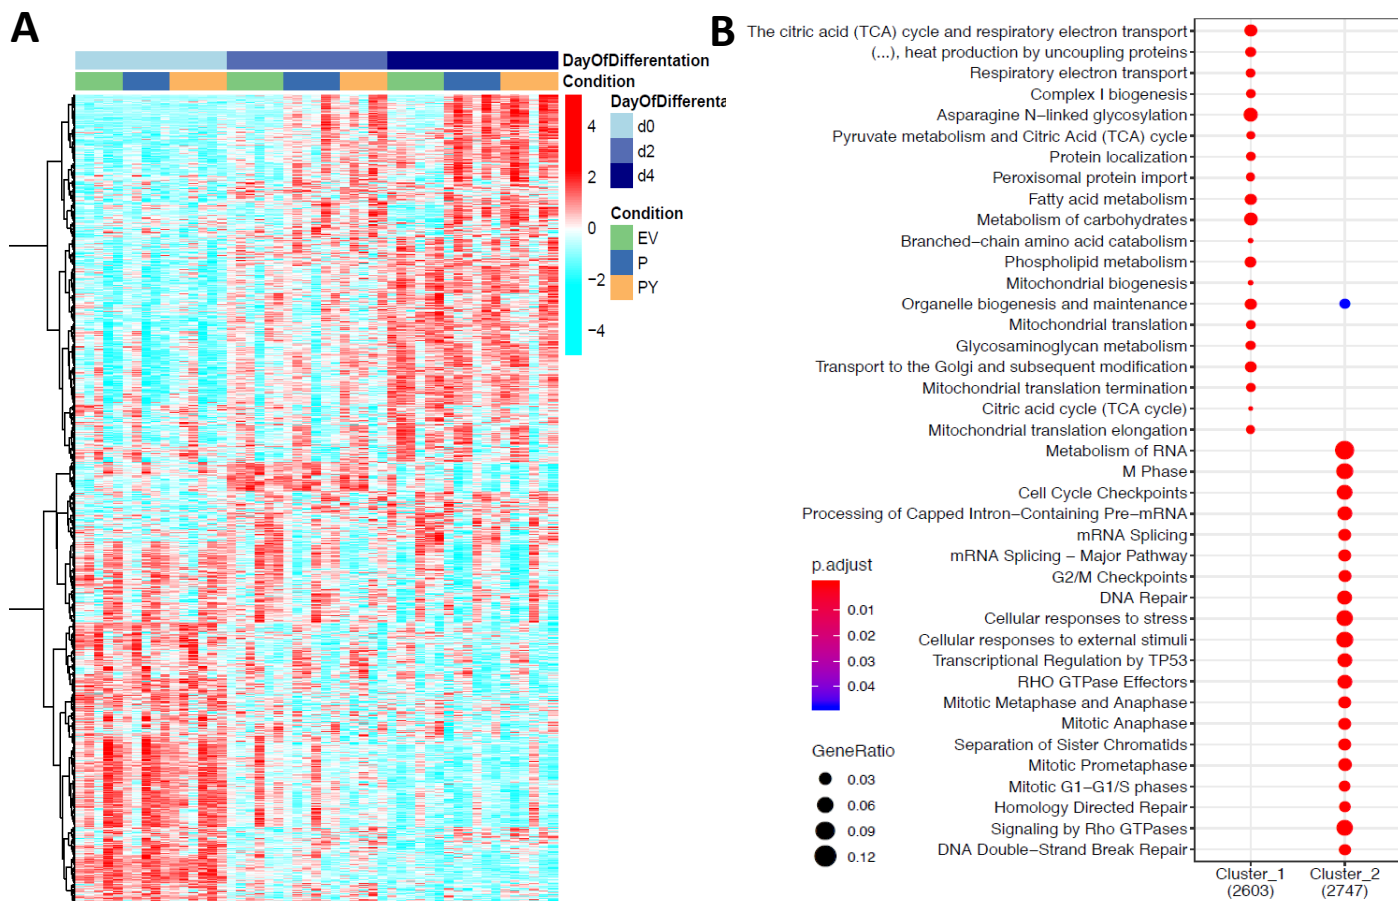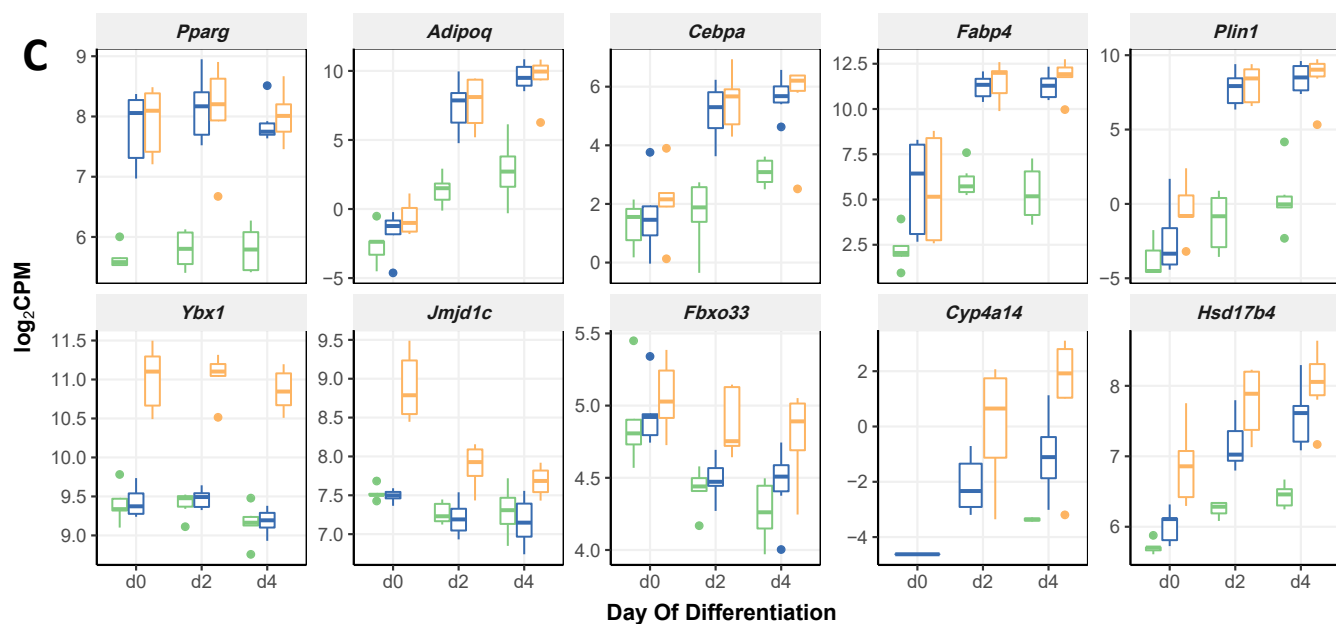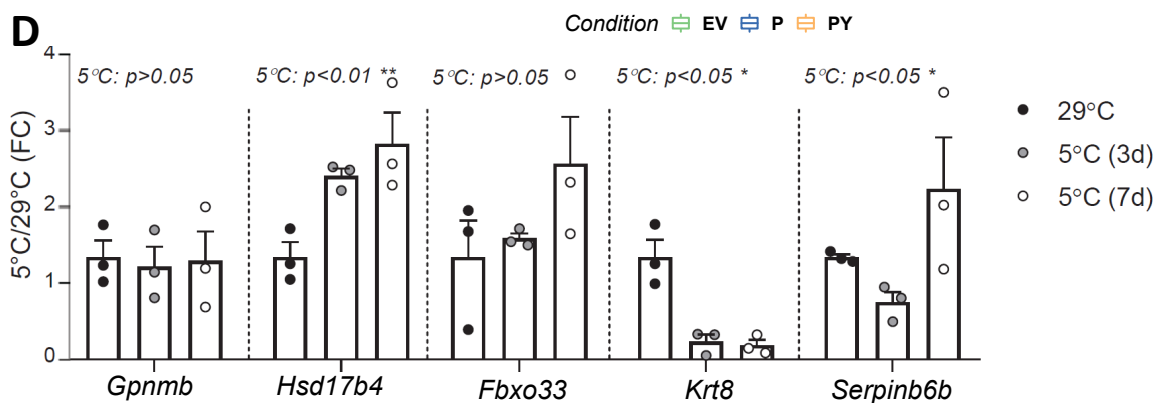

Figure S5. Early changes in gene expression induced by Co-expression of Ybx1 with Pparg2 in differentiating C3H/10T1/2-SAM cells, Related to Figure 5.
